# Supplementary material
Source: publisher figshare collection journal article supplement (https://gsajournals.figshare.com/ndownloader/files/22365780)
Supplement: Supplementary file 1 [file 22365780]

**A.**

**
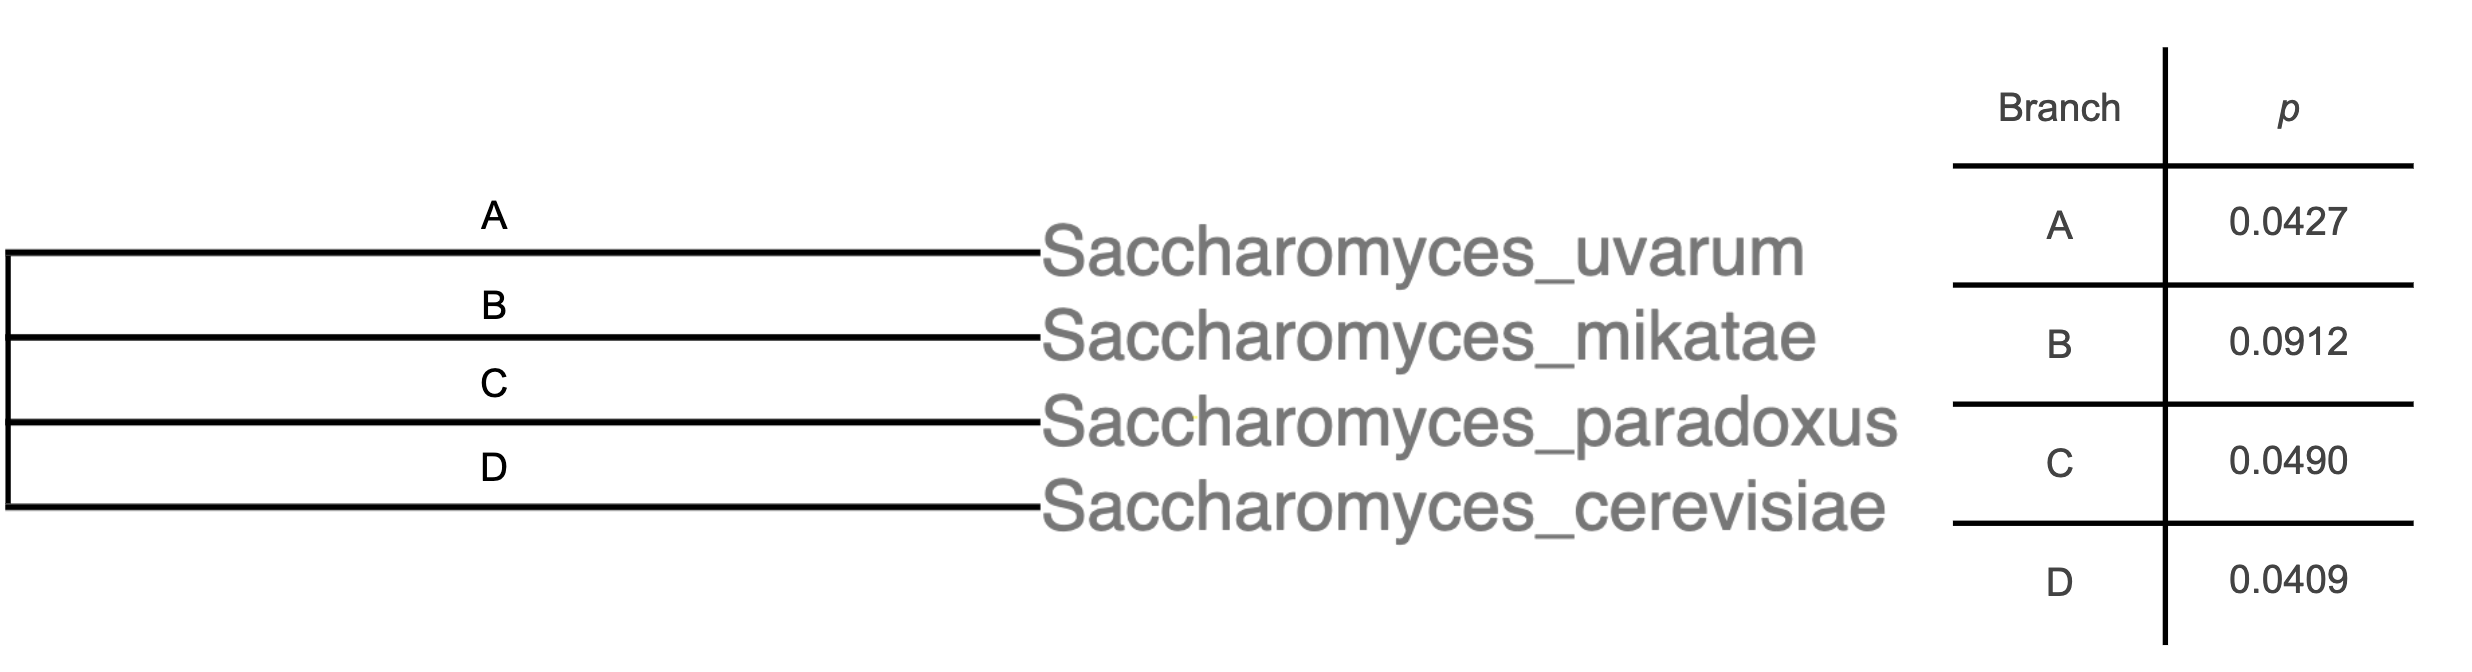
**

**B.**

**
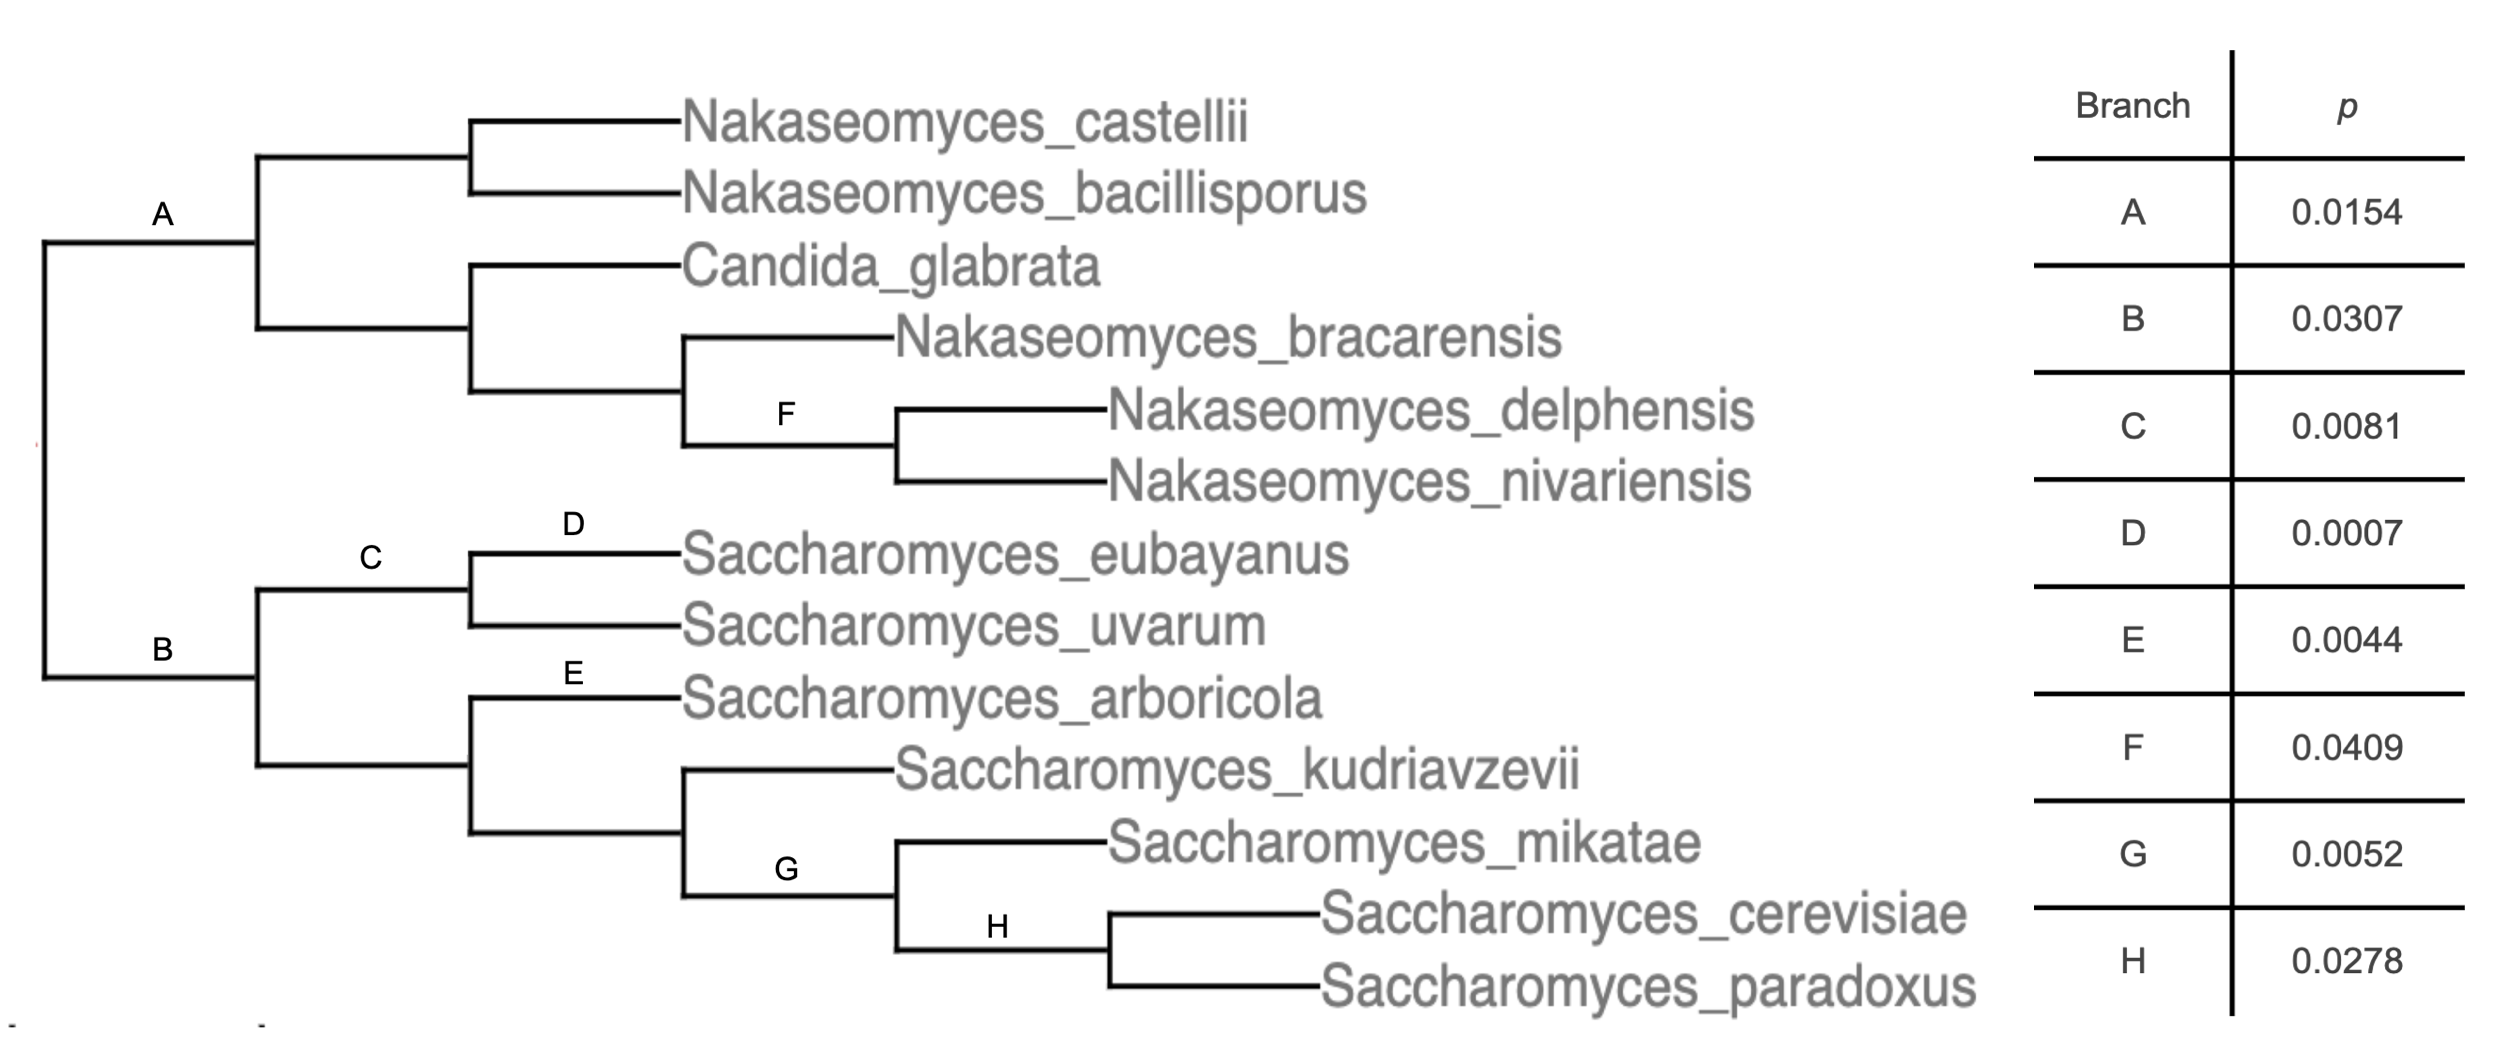
**

**Figure S1: Phylogenetic analysis of peroxisomal membrane genes.** (A) Each cell on the right reports the resampling-based significance values from a test for elevated branch length in the genes of GO:0005778, for the branch labeled at left. (B) Data are as in (A), except that a wider range of species was analyzed and only branches where *p* < 0.05 are reported.
